# Supplementary material
Source: PubMed Central journal article supplement (PMC6794661)
Supplement: ChanSupplementalMaterial_rev.pdf [file ChanSupplementalMaterial_rev.pdf]

Supplementary\_Table1. Intraclass correlation coefficients of MZ and DZ and heritability of bilateral NAcc activation when anticipating the three monetary conditions: Gain, Loss and No-incentive

|              | rMZ<br>(N = 86 ) | rDZ<br>(N = 88 ) | Model <sup>a</sup> | $h^2$ [95%CI]     | $c^2$ [95%CI]     | $e^2$ [95%CI]     |
|--------------|------------------|------------------|--------------------|-------------------|-------------------|-------------------|
| Gain         | 0.546**          | 0.17             | AE                 | 0.46 [0.21, 0.64] | -                 | 0.54 [0.64, 0.36] |
| Loss         | 0.395**          | 0.302*           | AE                 | 0.36 [0.11, 0.56] | -                 | 0.64 [0.56, 0.44] |
| No-incentive | 0.418**          | 0.372*           | CE                 | -                 | 0.33 [0.13, 0.51] | 0.67 [0.51, 0.49] |

Note: \*,  $p < 0.01$ ; \*\*,  $p < 0.05$ ; MZ = Monozygotic twins; DZ = Dizygotic twins; <sup>a</sup>, best fitted model with the lowest Akaike's Information Criterion;  $h^2$  = heritability, additive genetic effect;  $c^2$  = common environment effect;  $e^2$  = unique environment effect; CI = confidence interval.

Supplementary\_Table2. Heritability of self-report measures of pleasure experience and bilateral NAcc activation in Cholesky ACE model

|       | $h^2$ [95%CI]     | $c^2$ [95%CI]  | $e^2$ [95%CI]     |
|-------|-------------------|----------------|-------------------|
| NAcc  | 0.35 [0.01, 0.62] | 0.08 [0, 0.4]  | 0.58 [0.38, 0.82] |
| RCPAS | 0.58 [0.22, 0.75] | 0.02 [0, 0.29] | 0.4 [0.25, 0.62]  |
| TEPS  | 0.27 [0.02, 0.53] | 0.02 [0, 0.24] | 0.71 [0.46, 0.96] |

Note:  $h^2$  = heritability, additive genetic effect;  $c^2$  = common environment effect;  $e^2$  = unique environment effect; CI = confidence interval; RCSAS = Revised Chapman Social Anhedonia Scale; RCPAS = Revised Chapman Physical Anhedonia Scale; TEPS = Temporal Experience Pleasure Scale; NAcc = Activation of Nucleus Accumbens during the anticipation of monetary gain.
